# Supplementary material
Source: PubMed Central journal article supplement (PMC4096808)

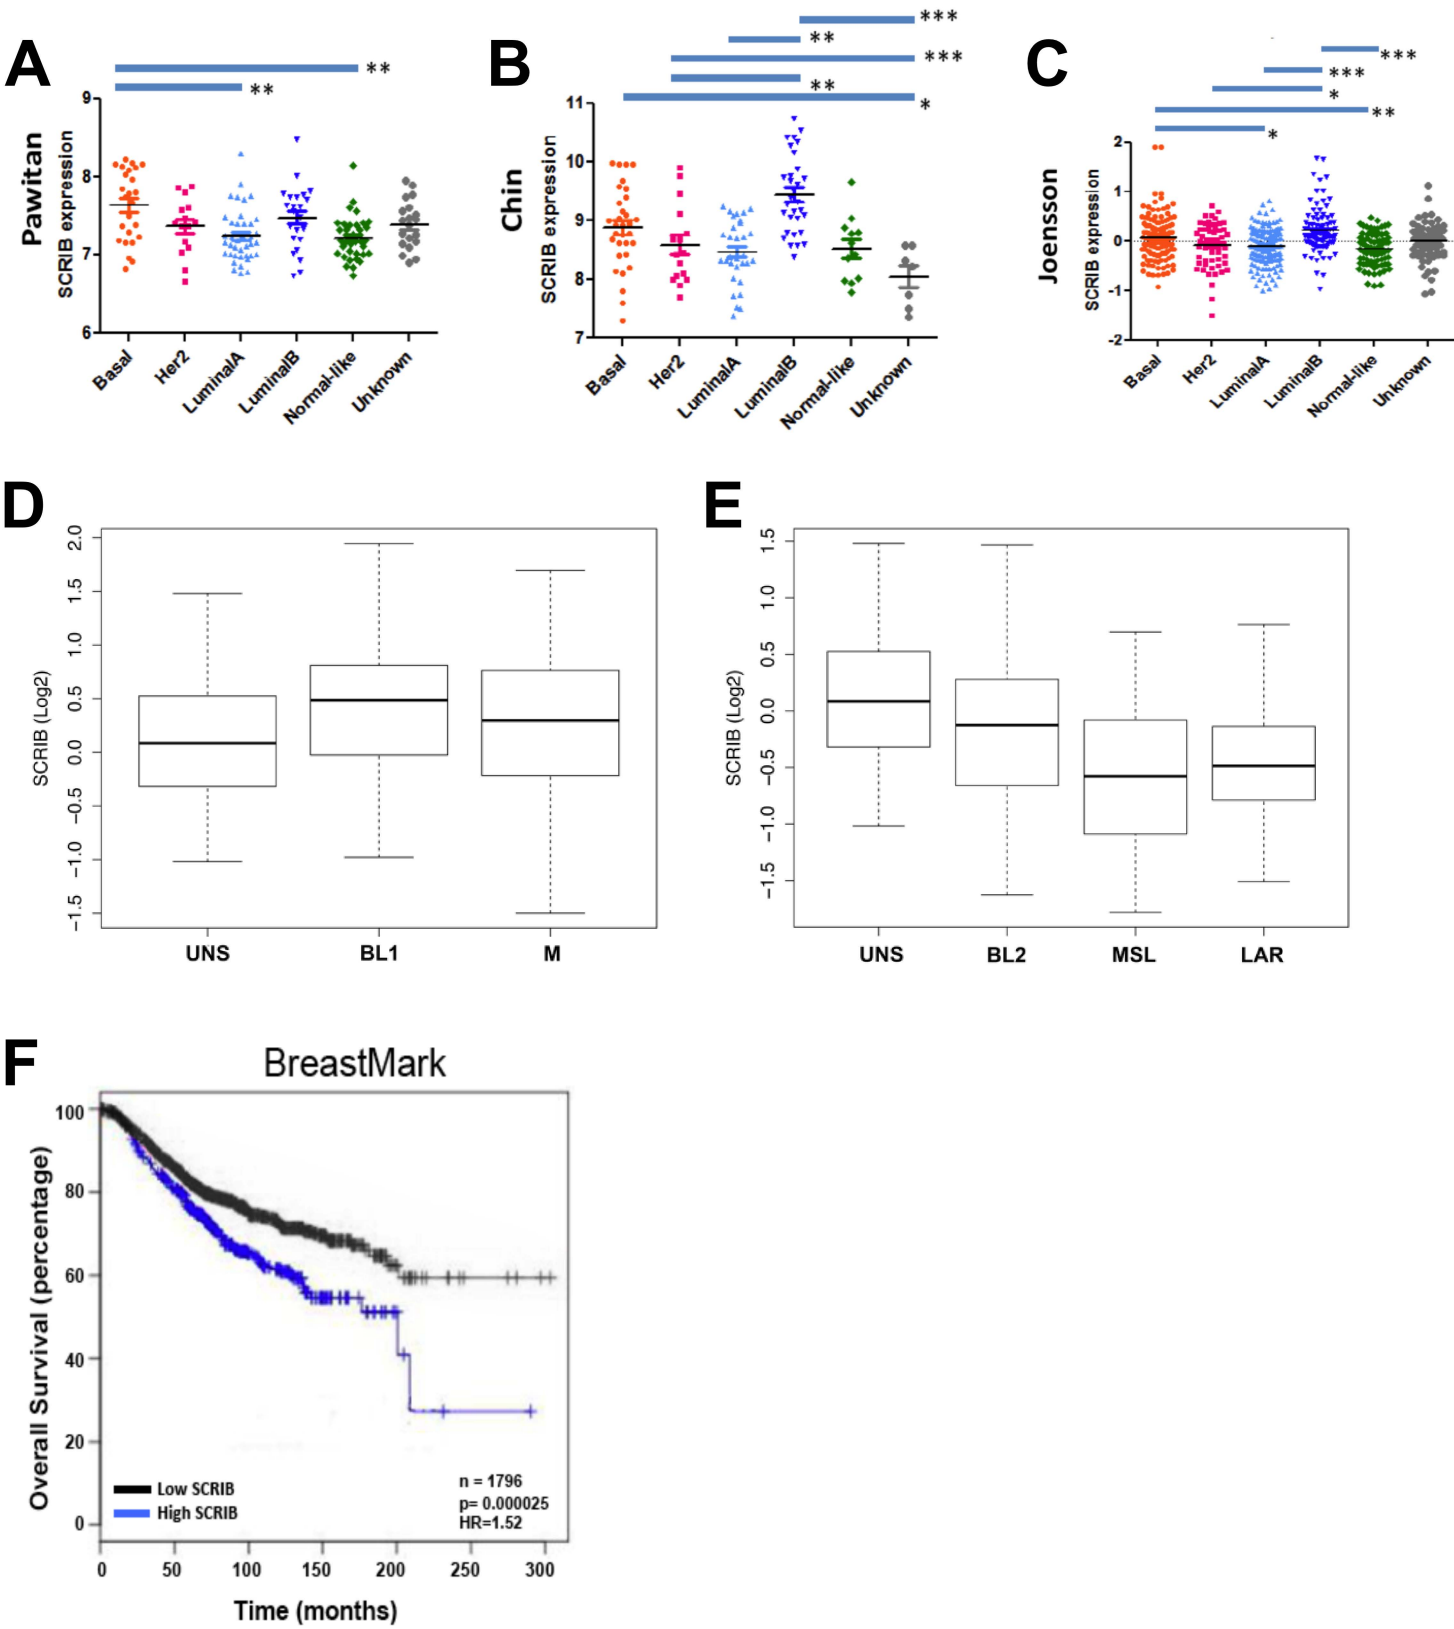

Supplement: NIHMS579974-supplement-1.pdf [file NIHMS579974-supplement-1.pdf]

**A**

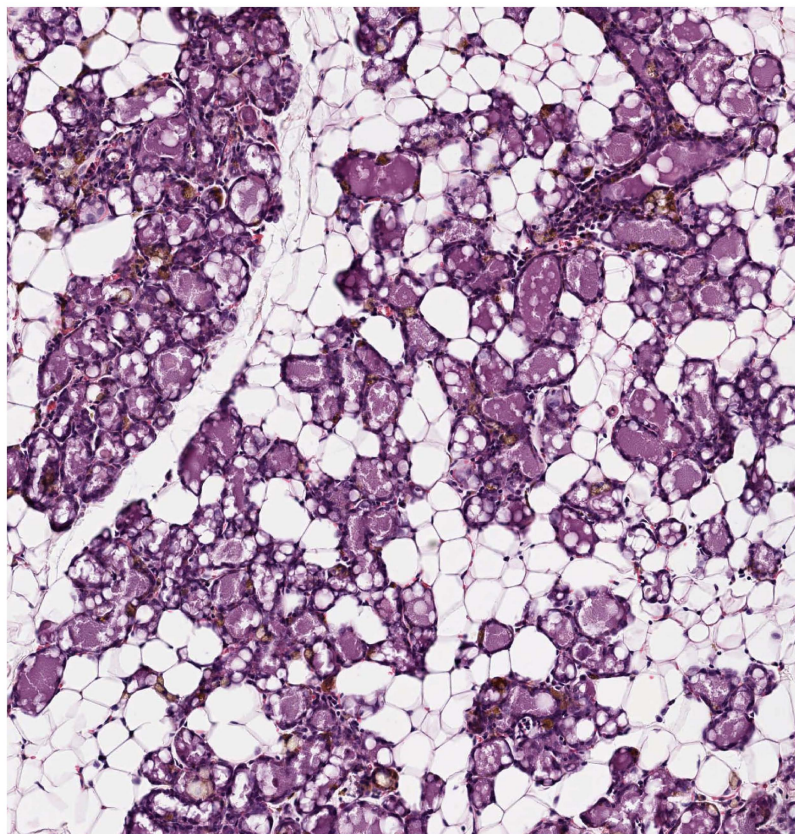

**B**

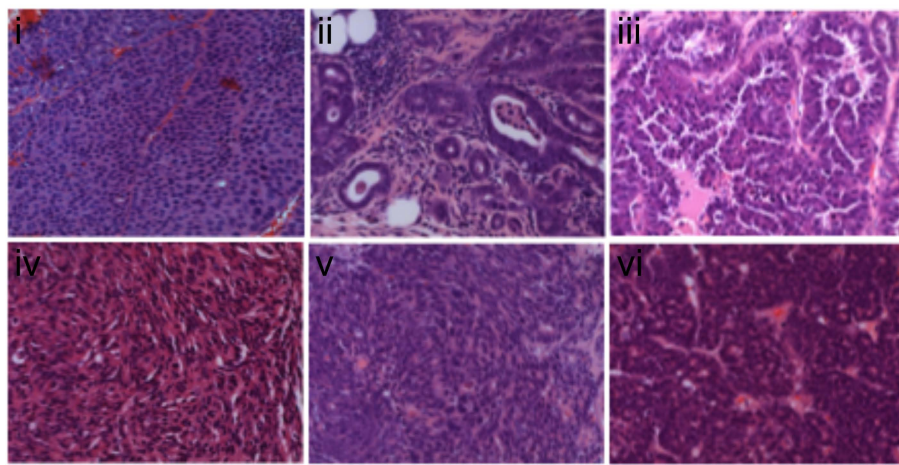

Supplement: NIHMS579974-supplement-2.pdf [file NIHMS579974-supplement-2.pdf]

**A**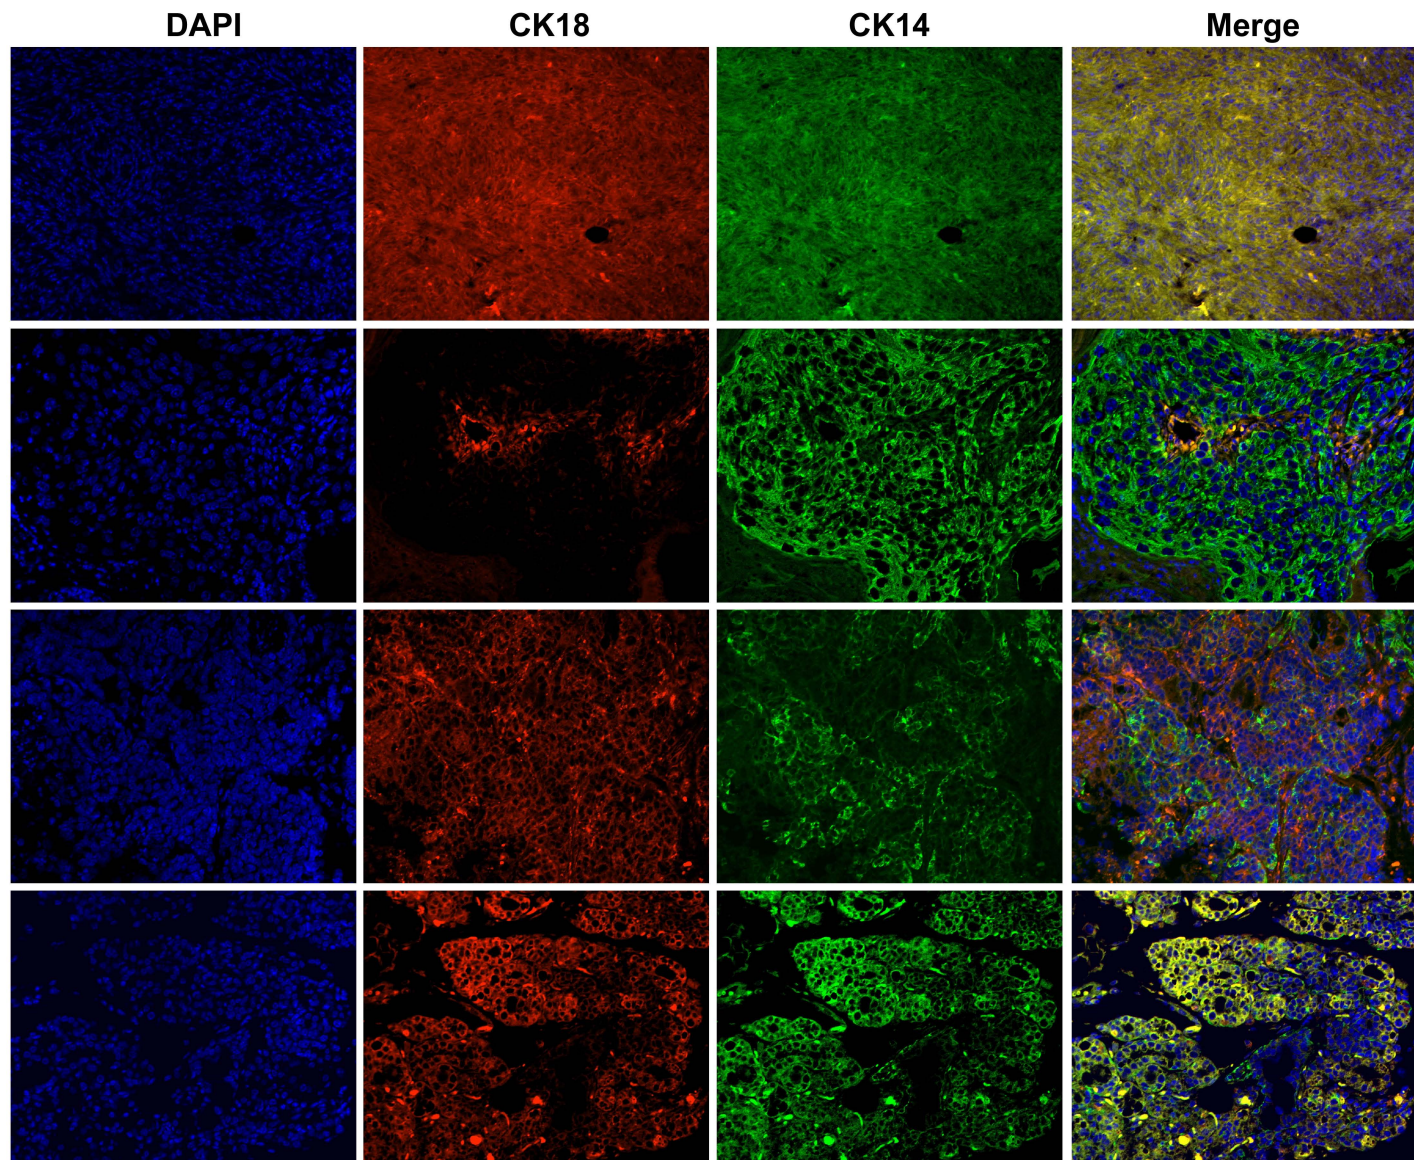**B**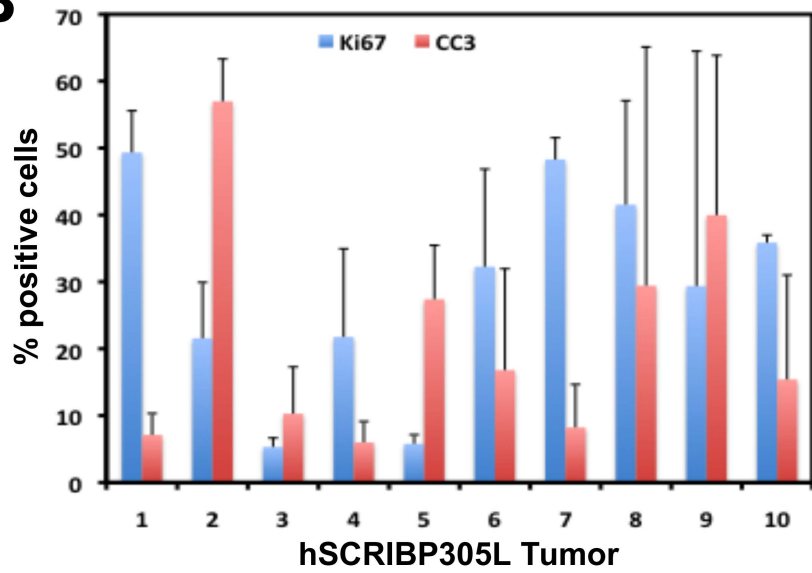

Supplement: NIHMS579974-supplement-3.pdf [file NIHMS579974-supplement-3.pdf]

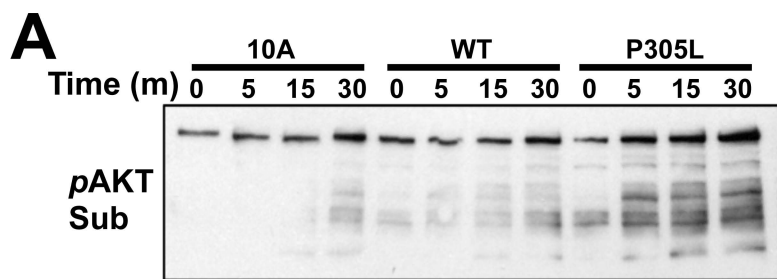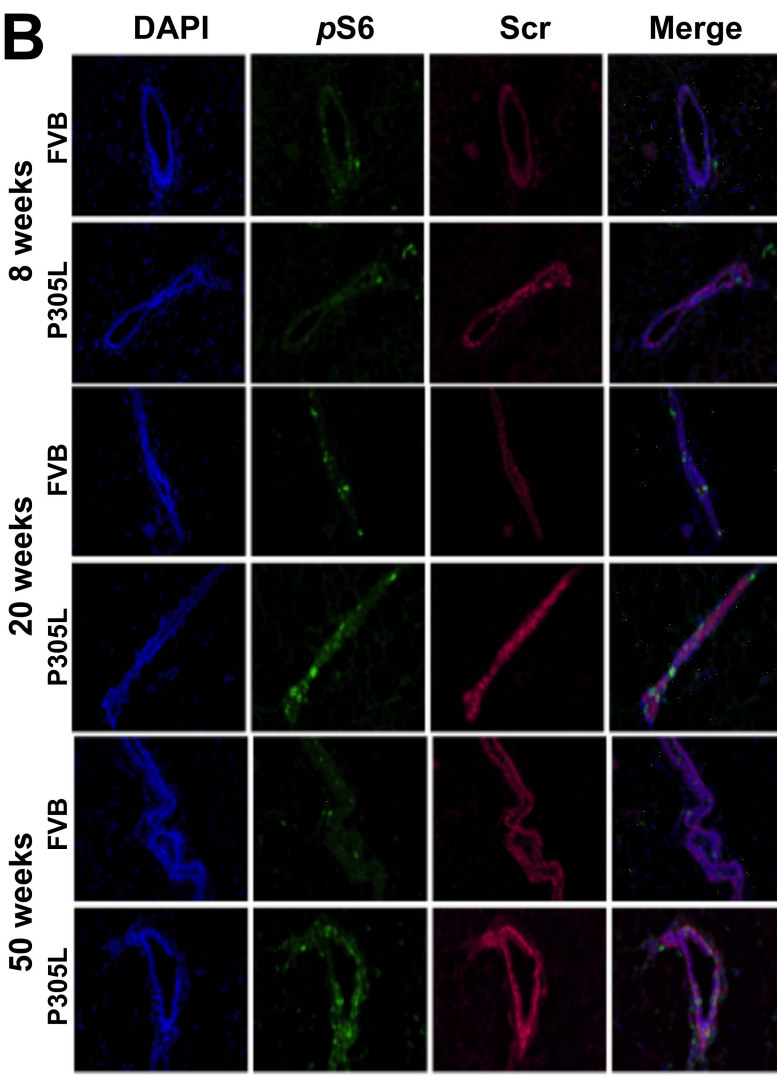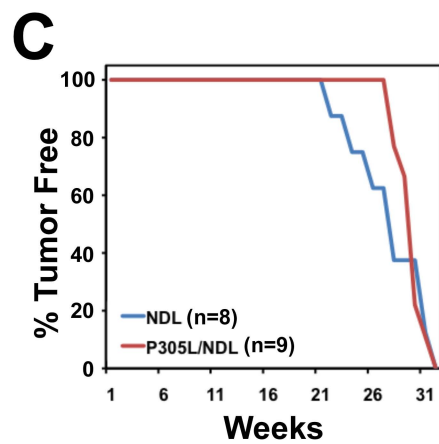

Supplement: NIHMS579974-supplement-4.pdf [file NIHMS579974-supplement-4.pdf]
